# Supplementary material
Source: Springer Nature journal article supplement (https://www.springermedizin.de/resource/supplementary/12889_2013_6475_MOESM2_ESM.pdf/9497972)

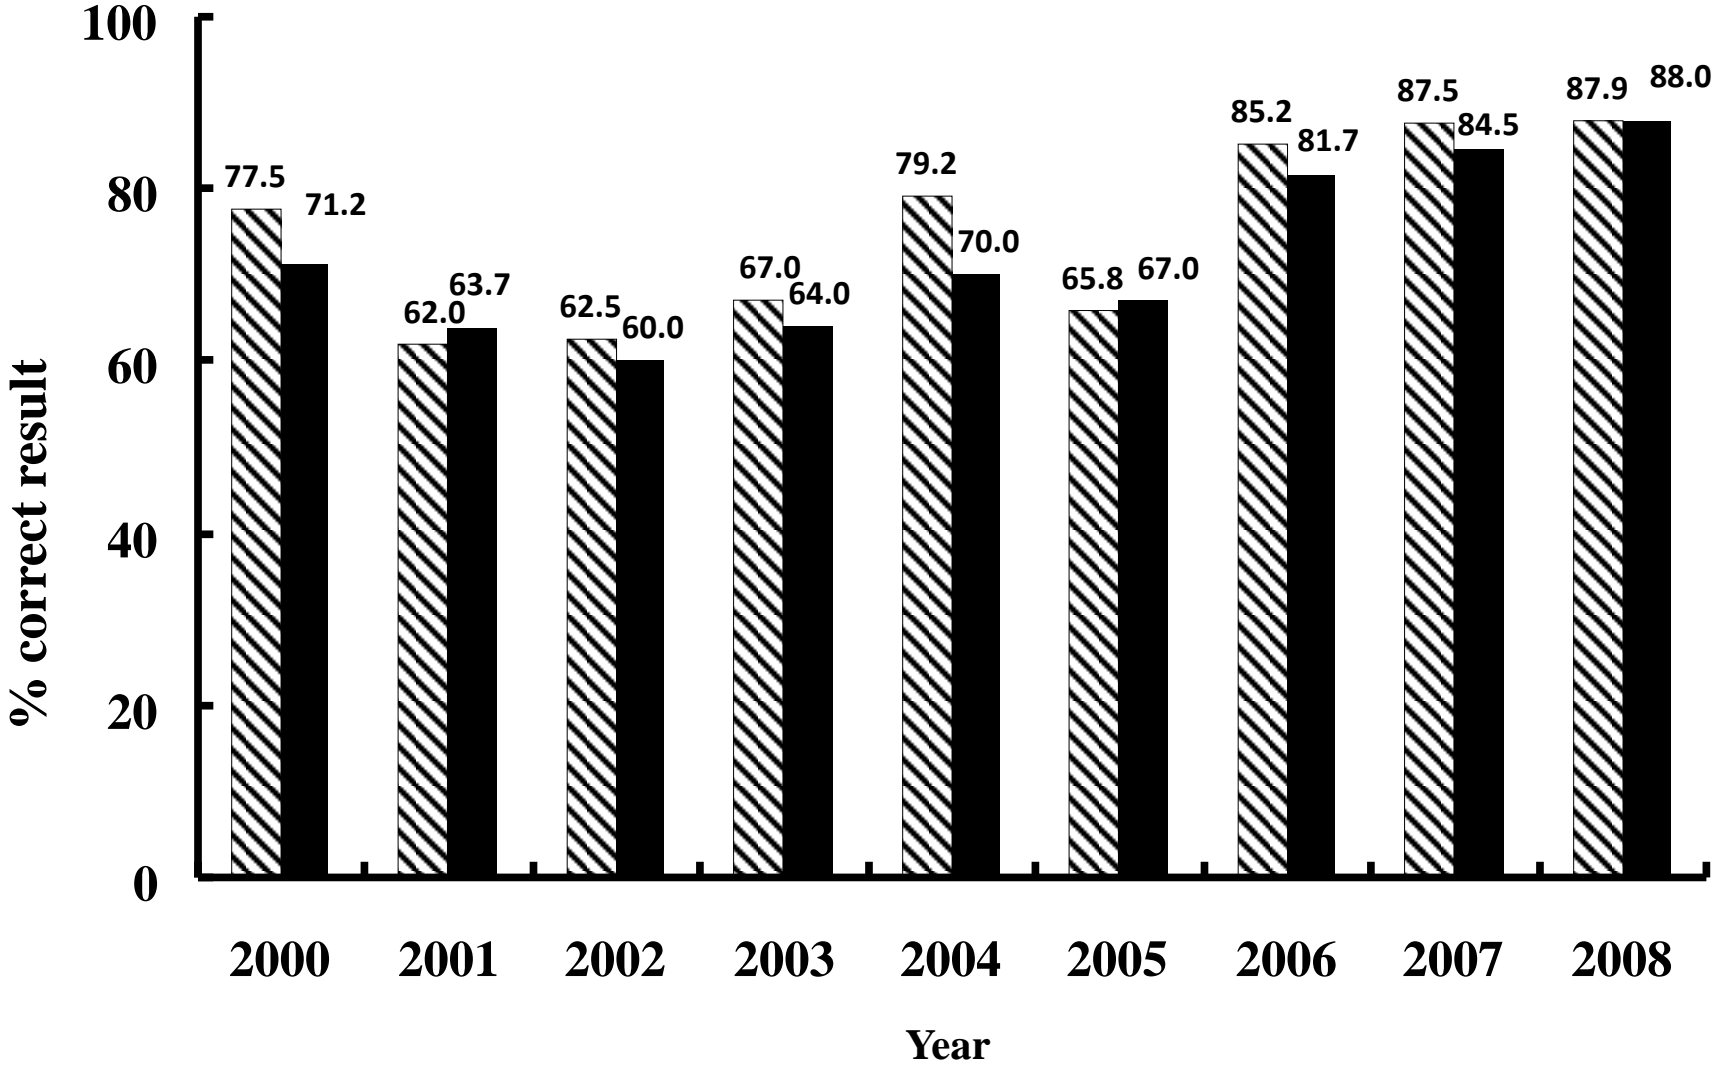

Supplement: MOESM2 [file 9497972]
